# Supplementary material for: An in vitro compartmental system underlines the contribution of mitochondrial immobility to the ATP supply in the NMJ
Source: Oxford University Press journal article supplement (doi:10.1242/jcs.234492), 2019-11-13
Supplement: jcs234492supp.pdf [file jcs234492supp.pdf]

## Supplementary figures

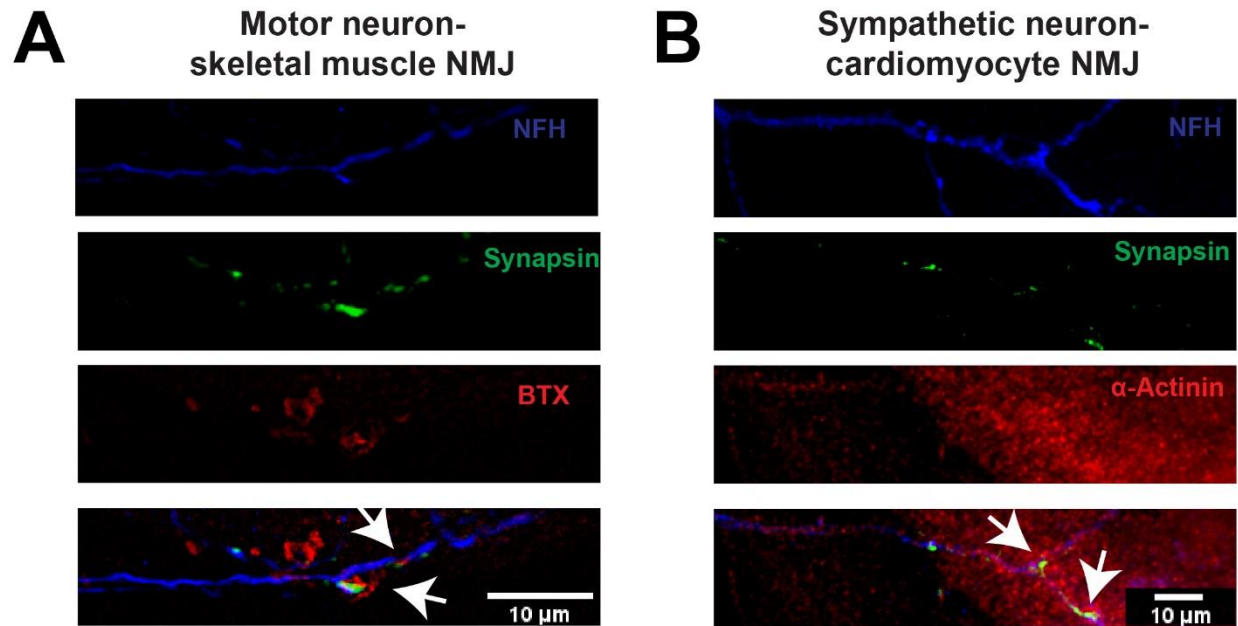

**Fig. S1. MN and SN form synapses in an *in vitro* co-culture system.** (A-B) Confocal images displaying co-localization of neuronal marker (NFH-blue), pre-synaptic marker (Synapsin I-green), and post-synaptic marker (BTX in skeletal muscles and  $\alpha$ -actinin for cardiomyocytes) in MN-skeletal muscle co-culture (A) and SN-cardiomyocyte co-culture (B). Scale bar = 10  $\mu$ m.

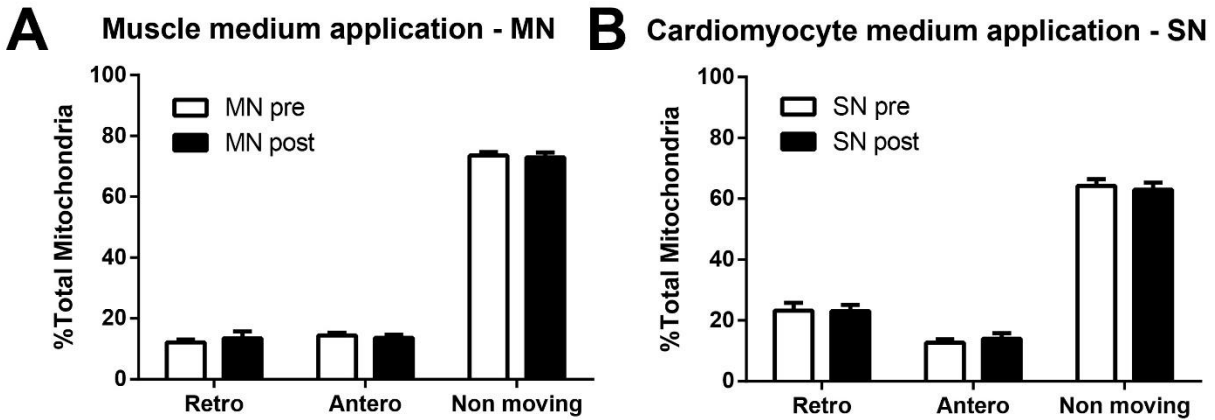

**Fig. S2. Muscle conditioned media does not influence mitochondrial axonal transport.** (A-B) Mitochondrial axonal transport analysis of MN (A) or SN (B) explants grown in MFC, before and after application of muscle (A) or cardiomyocyte (B) conditioned media for 3 hours. There was no apparent change in overall transport or directionality.  $n=8$  MFCs for MNs and  $n=7$  MFCs for SNs, at least 8 axons per MFC. The same chambers were imaged in the pre and post condition media application conditions. Two-way Anova with Holm-Sidak post-hoc test. Each graph contains at least 3 independent biological repeats. Data error bars represent mean  $\pm$  SEM.

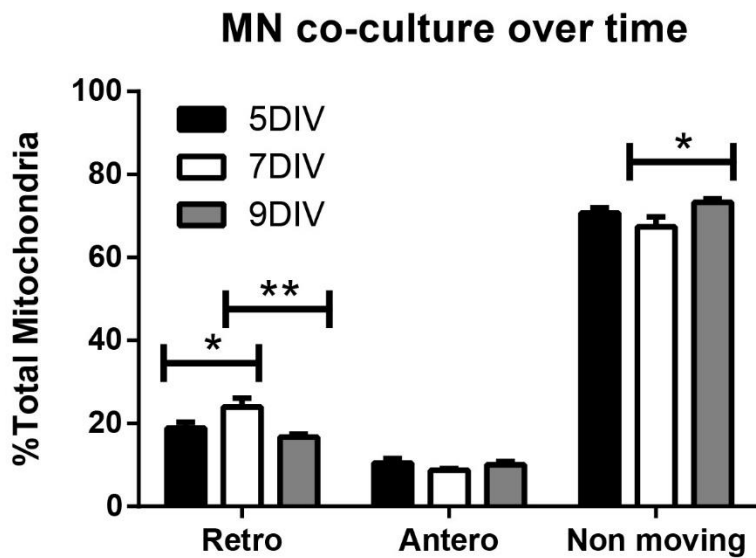

**Fig. S3. MN mitochondrial axonal transport is only slightly influenced by NMJ formation.**

(A-B) Mitochondrial axonal transport analysis of MN explants in co-culture with skeletal muscles at time points 5,7 and 9 DIV. A slight increase in retrograde transport was observed at 7 DIV compared to 5 DIV but this was reversed at 9 DIV. \*\* $p < 0.01$ , \* $p < 0.05$ , two-way Anova with Holm-Sidak post-hoc test.  $n=8$  MFCs per condition, at least 8 axons per MFC. The same chambers were imaged over time.

Each graph contains at least 3 independent biological repeats. Data error bars represent mean  $\pm$  SEM.

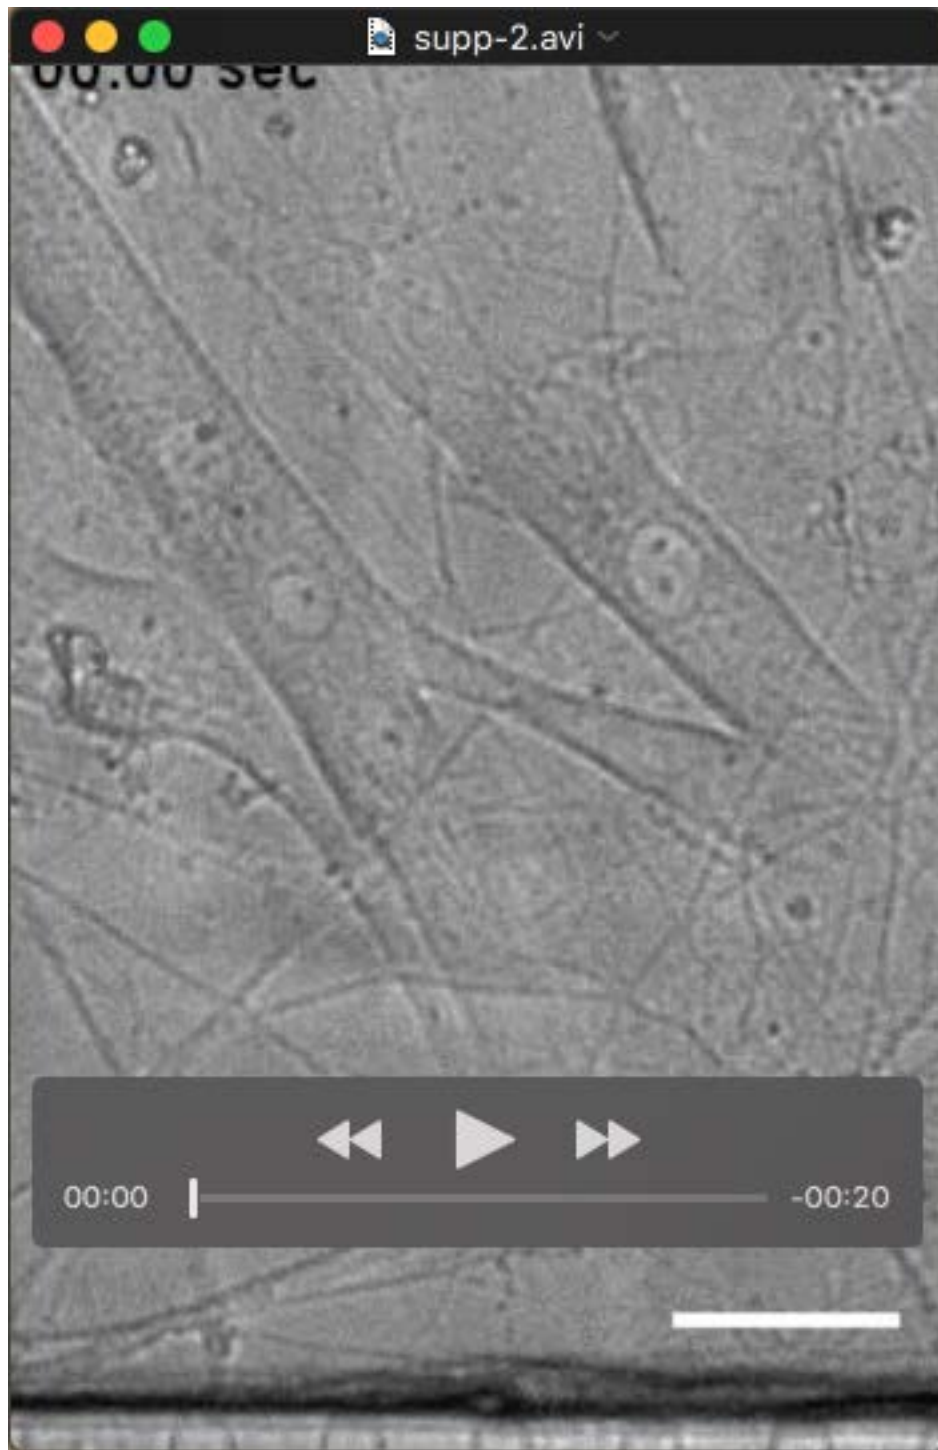

**Movie 1. Skeletal muscle contraction in the presence of overlaying MN.** 20X magnification of 1000 frames; 30-second movie of muscles innervated by MN in MFC. Scale bar=20 $\mu$ m.

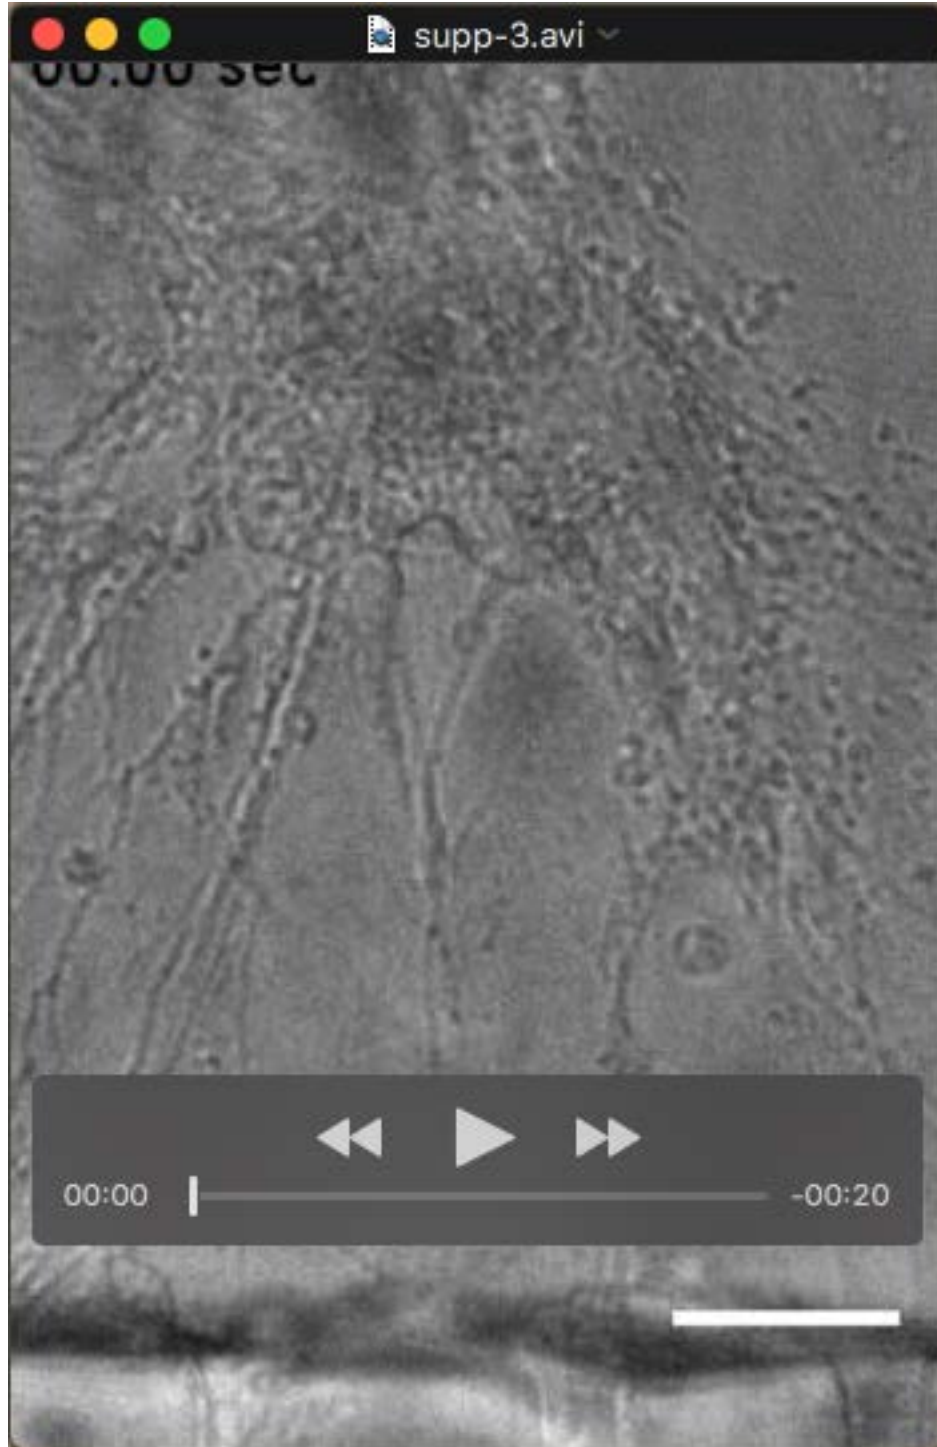

**Movie 2. Cardiomyocyte contraction in the presence of overlaying SN.** 20X magnification of 1000 frames; 30-second movie of cardiomyocytes innervated by SN in MFC. Scale bar=20 $\mu$ m.
